# Supplementary material for: The oxidation of 6-hydroxydopamine in aqueous solution. Part 2. Speciation and product distribution with iron(III) as oxidant
Source: Royal Society of Chemistry journal article supplement (doi:10.1039/b007162p), 2001-01-01
Supplement: b007162p.doc [file b007162p.doc]

**Supplementary data**

**1.1** Typical ortho-quinone rate data - first-order rate constants measured at  = 390 nm

|  |  |  |  |  | **Endpt.** | **pathlength** |
| --- | --- | --- | --- | --- | --- | --- |
| **pH** | **pH (corr.)** | **[Fe]T / M** | **[L]T / M** | ***k*obs / s-1** | **/ Abs** | **/ cm** |
| 0.920 | 0.78 | 4.09E-05 | 6.91E-04 | 0.01536 | 0.0153 | 1.0 |
| 1.010 | 0.88 | 1.02E-05 | 1.52E-03 | 0.03421 | 0.0040 | 1.0 |
| 1.010 | 0.88 | 7.63E-05 | 1.52E-03 | 0.05424 | 0.0290 | 1.0 |
| 1.020 | 0.89 | 2.55E-04 | 1.52E-03 | 0.06032 | 0.0966 | 1.0 |
| 1.130 | 1.01 | 6.14E-05 | 3.79E-04 | 0.01626 | 0.0240 | 1.0 |
| 1.164 | 1.05 | 2.46E-04 | 2.63E-03 | 0.08071 | - | 1.0 |
| 1.170 | 1.06 | 7.66E-05 | 1.51E-03 | 0.06341 | 0.0307 | 1.0 |
| 1.200 | 1.09 | 3.00E-04 | 2.98E-04 | 0.02162 | 0.1170 | 1.0 |
| 1.280 | 1.18 | 4.94E-05 | 2.82E-04 | 0.01640 | - | 1.0 |
| 1.360 | 1.26 | 2.47E-04 | 3.11E-03 | 0.18930 | 0.0953 | 1.0 |
| 1.400 | 1.30 | 2.50E-05 | 1.47E-03 | 0.09005 | - | 0.2 |
| 1.420 | 1.33 | 8.90E-05 | 7.30E-04 | 0.05832 | 0.0340 | 1.0 |
| 1.550 | 1.46 | 2.50E-04 | 1.75E-03 | 0.16190 | 0.0950 | 1.0 |
| 1.690 | 1.61 | 7.45E-05 | 1.53E-03 | 0.21060 | - | 0.2 |
| 1.700 | 1.62 | 2.48E-04 | 1.53E-03 | 0.32160 | 0.0190 | 0.2 |
| 2.023 | 1.96 | 3.22E-05 | 3.70E-04 | - | 0.0023 | 0.2 |
| 2.700 | 2.65 | 2.74E-05 | 3.41E-04 | - | 0.0092 | 1.0 |
| 2.700 | 2.65 | 5.47E-05 | 3.41E-04 | 0.22220 | 0.0200 | 1.0 |
| 2.722 | 2.67 | 1.48E-04 | 7.00E-04 | 0.67500 | 0.0485 | 1.0 |
| 2.850 | 2.80 | 2.61E-05 | 1.90E-04 | - | - | 1.0 |
| 2.940 | 2.89 | 1.48E-04 | 7.00E-04 | 0.93700 | 0.0450 | 1.0 |
| 3.170 | 3.13 | 2.07E-04 | 6.71E-04 | 1.00530 | 0.0630 | 1.0 |
| 3.290 | 3.25 | 1.48E-04 | 6.71E-04 | 1.12000 | 0.0424 | 1.0 |
| 3.410 | 3.37 | 1.52E-04 | 7.20E-04 | - | 0.0400 | 1.0 |
| 3.520 | 3.48 | 1.48E-04 | 6.71E-04 | 1.46500 | 0.0390 | 1.0 |
| 3.555 | 3.52 | 9.11E-05 | 7.20E-04 | - | 0.0209 | 1.0 |
| 3.660 | 3.62 | 5.92E-05 | 6.71E-04 | 1.47050 | 0.0130 | 1.0 |
| 3.760 | 3.72 | 1.52E-04 | 7.20E-04 | - | 0.0237 | 1.0 |
| 3.800 | 3.76 | 8.90E-05 | 6.71E-04 | 2.17600 | 0.0127 | 1.0 |
| 3.900 | 3.87 | 1.48E-04 | 7.00E-04 | - | - | 1.0 |
| 3.910 | 3.88 | 4.56E-05 | 7.20E-04 | - | 0.0070 | 1.0 |
| 4.050 | 4.02 | 1.21E-04 | 7.20E-04 | - | 0.0090 | 1.0 |
| 4.100 | 4.07 | 5.93E-05 | 6.71E-04 | 2.85500 | 0.0038 | 1.0 |
| 4.282 | 4.25 | 4.56E-05 | 7.20E-04 | - | 0.0026 | 1.0 |
| 4.450 | 4.42 | 8.90E-05 | 6.71E-04 | 3.52000 | 0.0027 | 1.0 |
| 4.763 | 4.74 | 4.56E-05 | 7.20E-04 | - | 0.0015 | 1.0 |
| 4.825 | 4.80 | 9.11E-05 | 7.20E-04 | - | 0.0037 | 1.0 |

**1.2** Typical para-quinone rate data - first-order rate constants measured at  = 265 nm

|  |  |  |  |  | **Endpt.** | pathlength |
| --- | --- | --- | --- | --- | --- | --- |
| **pH** | **pH (corr.)** | **[Fe]T / M** | **[L]T / M** | ***k*obs / s-1** | **/ Abs** | **/ cm** |
| 0.920 | 0.78 | 4.09E-05 | 6.91E-04 | 0.0218 | 0.2000 | 1.0 |
| 0.960 | 0.82 | 8.18E-05 | 6.91E-04 | 0.0232 | 0.4000 | 1.0 |
| 1.000 | 0.87 | 2.55E-05 | 1.52E-03 | 0.0304 | - | 1.0 |
| 1.010 | 0.88 | 7.63E-05 | 1.52E-03 | 0.0497 | - | 1.0 |
| 1.101 | 0.98 | 4.98E-05 | 3.89E-04 | 0.0219 | 0.2000 | 1.0 |
| 1.120 | 1.00 | 2.08E-05 | 3.60E-04 | 0.0182 | 0.1000 | 1.0 |
| 1.130 | 1.01 | 5.11E-05 | 3.79E-04 | 0.0214 | 0.2280 | 1.0 |
| 1.170 | 1.06 | 7.66E-05 | 1.51E-03 | 0.0687 | - | 1.0 |
| 1.200 | 1.09 | 2.55E-05 | 1.51E-03 | 0.0419 | - | 1.0 |
| 1.200 | 1.09 | 6.01E-05 | 2.98E-04 | 0.0175 | - | 1.0 |
| 1.420 | 1.33 | 2.97E-05 | 7.30E-04 | 0.0427 | 0.1600 | 1.0 |
| 1.420 | 1.33 | 8.90E-05 | 7.30E-04 | 0.0555 | 0.4700 | 1.0 |
| 1.550 | 1.46 | 1.25E-04 | 1.75E-03 | 0.1732 | - | 1.0 |
| 1.700 | 1.62 | 2.48E-04 | 1.53E-03 | 0.2370 | - | 1.0 |
| 2.014 | 1.95 | 2.15E-05 | 3.70E-04 | - | - | 0.2 |
| 2.023 | 1.96 | 3.22E-05 | 3.70E-04 | - | - | 0.2 |
| 2.030 | 1.96 | 9.12E-05 | 3.70E-04 | - | 0.5347 | 1.0 |
| 2.722 | 2.67 | 1.48E-04 | 7.00E-04 | 0.6500 | 0.8800 | 1.0 |
| 2.940 | 2.89 | 1.48E-04 | 7.00E-04 | 0.9156 | 0.8100 | 1.0 |
| 3.170 | 3.13 | 2.07E-04 | 6.71E-04 | 0.9405 | 1.1100 | 1.0 |
| 3.290 | 3.25 | 1.48E-04 | 6.71E-04 | 1.0565 | 0.8090 | 1.0 |
| 3.410 | 3.37 | 1.52E-04 | 7.20E-04 | - | 0.7700 | 1.0 |
| 3.520 | 3.48 | 1.48E-04 | 6.71E-04 | 1.3310 | 0.7770 | 1.0 |
| 3.525 | 3.49 | 1.48E-04 | 1.06E-03 | - | - | 1.0 |
| 3.555 | 3.52 | 9.11E-05 | 7.20E-04 | - | 0.4246 | 1.0 |
| 3.660 | 3.62 | 5.92E-05 | 6.71E-04 | 1.3022 | 0.2460 | 1.0 |
| 3.760 | 3.72 | 1.52E-04 | 7.20E-04 | - | 0.5161 | 1.0 |
| 3.800 | 3.76 | 8.90E-05 | 6.71E-04 | 1.3920 | 0.2750 | 1.0 |
| 3.900 | 3.87 | 1.48E-04 | 7.00E-04 | - | 0.4600 | 1.0 |
| 3.910 | 3.88 | 4.56E-05 | 7.20E-04 | - | 0.1560 | 1.0 |
| 4.100 | 4.07 | 5.93E-05 | 6.71E-04 | 1.5998 | - | 1.0 |
| 4.282 | 4.25 | 4.56E-05 | 7.20E-04 | - | 0.1114 | 1.0 |
| 4.450 | 4.42 | 8.90E-05 | 6.71E-04 | 1.2700 | 0.1820 | 1.0 |
| 4.450 | 4.42 | 8.90E-05 | 6.71E-04 | - | 0.1820 | 1.0 |
| 4.763 | 4.74 | 4.56E-05 | 7.20E-04 | - | 0.0700 | 1.0 |

**1.3** Typical deprotonated-quinone rate data - first-order rate constants measured at  = 480 nm

|  |  |  |  |  | **Endpt.** | **pathlength** |
| --- | --- | --- | --- | --- | --- | --- |
| **pH** | **pH (corr.)** | **[Fe]T / M-1** | **[L]T / M-1** | ***k*obs / s-1** | **/ Abs** | **/ cm** |
| 2.722 | 2.67 | 1.48E-04 | 7.00E-04 | 0.818 | 0.0152 | 1.0 |
| 2.940 | 2.89 | 1.48E-04 | 7.00E-04 | - | 0.0186 | 1.0 |
| 3.170 | 3.13 | 2.07E-04 | 6.71E-04 | 0.974 | 0.0341 | 1.0 |
| 3.290 | 3.25 | 1.48E-04 | 6.71E-04 | 0.964 | 0.0300 | 1.0 |
| 3.410 | 3.37 | 1.52E-04 | 7.20E-04 | - | 0.0300 | 1.0 |
| 3.520 | 3.48 | 1.48E-04 | 6.71E-04 | 1.343 | 0.0376 | 1.0 |
| 3.555 | 3.52 | 9.11E-05 | 7.20E-04 | - | 0.0254 | 1.0 |
| 3.660 | 3.62 | 5.92E-05 | 6.71E-04 | 1.677 | 0.0192 | 1.0 |
| 3.800 | 3.76 | 8.90E-05 | 6.71E-04 | 1.733 | - | 1.0 |
| 3.830 | 3.80 | 8.87E-05 | 6.42E-04 | 1.910 | - | 1.0 |
| 3.900 | 3.87 | 1.48E-04 | 7.00E-04 | 2.450 | 0.0800 | 1.0 |
| 4.050 | 4.02 | 1.21E-05 | 7.20E-04 | - | 0.0650 | 1.0 |
| 4.100 | 4.07 | 5.93E-05 | 6.71E-04 | 2.590 | - | 1.0 |
| 4.450 | 4.42 | 8.90E-05 | 6.71E-04 | 3.730 | 0.0700 | 1.0 |

**1.4** Second-order rate constants

| **pH** | **k / M-1s-1** | / nm | species |
| --- | --- | --- | --- |
| 3.17 | 90 | 265 | pQ |
| 3.66 | 90 | 265 | pQ |
| 4.00 | 90 | 480 | Q- |
| 5.00 | 90 | 480 | Q- |
| 5.29 | 170 | 480 | Q- |
| 5.90 | 180 | 480 | Q- |
| 7.10 | 680 | 480 | Q- |

**1.5** Ionic strength dependence, I

a.) pH = 1.07; [6-hydroxydopamine] = 0.681mM; [Fe] = 0.110 mM

|  |  | *k*obs / s-1 | | log(*k*obs/*k*o) | |
| --- | --- | --- | --- | --- | --- |
| I / M | I1/2 | oQ | pQ | oQ | pQ |
| 0.10 | 0.32 | 0.0307 | 0.0322 | 0.022 | 0.026 |
| 0.54 | 0.74 | 0.0338 | 0.0355 | 0.064 | 0.068 |
| 0.76 | 0.87 | 0.0336 | 0.0357 | 0.062 | 0.071 |
| 0.99 | 0.10 | 0.0347 | 0.0369 | 0.075 | 0.085 |

b.) pH = 3.50; [6-hydroxydopamine] = 1.06 mM; [Fe] = 0.148 mM

|  |  | *k*obs / s-1 | | | log(*k*obs/*k*o) | | |
| --- | --- | --- | --- | --- | --- | --- | --- |
| I / M | I1/2 | oQ | pQ | Q- | oQ | pQ | Q- |
| 0.10 | 0.32 | 3.40 | 1.79 | 5.76 | 0.096 | 0.091 | 0.11 |
| 0.25 | 0.50 | 4.32 | 2.37 | 6.63 | 0.20 | 0.21 | 0.18 |
| 0.53 | 0.73 | 4.80 | 2.74 | 7.82 | 0.25 | 0.28 | 0.25 |
| 0.94 | 0.97 | 5.09 | 3.18 | 9.80 | 0.27 | 0.34 | 0.34 |

**2.1** Data to determine the molar extinction coefficient of 6-hydroxydopamine

| Conc. / mM | 0.292 | 0.486 | 0.506 | 0.584 | 0.749 | 0.973 | 1.012 | 1.498 |
| --- | --- | --- | --- | --- | --- | --- | --- | --- |
| Absorbance | 0.218 | 0.361 | 0.404 | 0.417 | 0.580 | 0.720 | 0.785 | 1.129 |
